# Supplementary material for: Efficient CRISPR/Cas12a-Based Genome-Editing Toolbox for Metabolic Engineering in Methanococcus maripaludis
Source: PubMed Central journal article supplement (PMC9295151; doi:10.1021/acssynbio.2c00137), 2022-06-22
Supplement: sb2c00137_si_001.pdf [file sb2c00137_si_001.pdf]

**Supporting information for article:**

**Efficient CRISPR/Cas12a-based genome editing toolbox for metabolic engineering in *Methanococcus maripaludis***

Jichen Bao, Enrique de Dios Mateos, Silvan Scheller\*

Department of Bioproducts and Biosystems, School of Chemical Engineering, Aalto University, FI-02150, Espoo, Finland

\*corresponding author: Silvan Scheller ([silvan.scheller@aalto.fi](mailto:silvan.scheller@aalto.fi))

**Table S1.** Plasmid list

| Plasmid        | Description                                                                                                                                                                 | Reference                 |
|----------------|-----------------------------------------------------------------------------------------------------------------------------------------------------------------------------|---------------------------|
| pLW40          | <i>E. coli/M. maripaludis</i> shuttle vector; the backbone of pMM002P                                                                                                       | 1                         |
| pMEV4          | <i>E. coli/M. maripaludis</i> shuttle vector, only replicates in <i>M. maripaludis</i> S0001 <sup>2</sup> , carrying codon-optimized <i>pac</i>                             | 3                         |
| pMEV4mTs       | Derived from pMEV4 carrying the synthetic terminator ( <i>Ts</i> )                                                                                                          | Provided by Prof. Whitman |
| pY016          | Nucleic acid sequence source of LbCas12a                                                                                                                                    | 4                         |
| pX165          | Nucleic acid sequence source of SpCas9                                                                                                                                      | 5                         |
| pMM002P        | CRISPR/LbCas12a toolbox plasmid                                                                                                                                             | This study                |
| pMM005         | CRISPR/SpCas9 toolbox plasmid                                                                                                                                               | This study                |
| p002-218       | pMM002P containing a guide sequence 5'-CCCACAGATGAATATACTCATTCC targeting to <i>flaI</i> (MMJJ_11570)                                                                       | This study                |
| p002-226       | pMM002P containing guide sequences 5'-GATATACCCGACACAATGATATCG and 5'-GTGTAACCATAACTGCTAATTTAT targeting to <i>flaJ</i> (MMJJ_11560) and <i>flaB3</i> (MMJJ_11640)          | This study                |
| p002-218-L1000 | p002-218, 1000 bp long homologous arms on each side, 25 bp from the RF to DSB                                                                                               | This study                |
| p002-218-L500  | p002-218, 500 bp long homologous arms on each side, 25 bp from the RF to DSB                                                                                                | This study                |
| p002-218-L250  | p002-218, 250 bp long homologous arms on each side, 25 bp from the RF to DSB                                                                                                | This study                |
| p002-218-D500  | p002-218, 1000 bp long homologous arms on each side, 500 bp from the RF to DSB                                                                                              | This study                |
| p002-218-D1000 | p002-218, 1000 bp long homologous arms on each side, 1000 bp from the RF to DSB                                                                                             | This study                |
| p002-218-uidA  | p002-218, <i>P<sub>fla<sub>J</sub></sub>-uidA-T<sub>fla</sub></i> ; the 1000 bp homologous arms on each side covers the promoter and the terminator of the flagellum operon | This study                |
| p002-226-uidA  | p002-226, <i>P<sub>fla<sub>J</sub></sub>-uidA-T<sub>fla</sub></i> ; the 1000 bp homologous arms on each side covers the promoter and the terminator of the flagellum operon | This study                |
| p002-253       | pMM002P containing a guide sequence 5'-AATGCAAGCTACAACACTGTGTAGAC targeting to <i>acs</i> (MMJJ_09370)                                                                      | This study                |
| p002-247       | pMM002P containing a guide sequence 5'-AGTGATACCTAACAGCCCTTCTC targeting to <i>nrpR</i> (MMJJ_03770)                                                                        | This study                |
| pPmtr-uidA     | suicide plasmid containing " <i>P<sub>mtr</sub>-uidA</i> " cassette, 1000 bp long homologous arms on each side, the promoter is from <i>M. vannielli</i> SB                 | This study                |
| pPmcr-uidA     | suicide plasmid containing " <i>P<sub>mcr</sub>-uidA</i> " cassette, 1000 bp long homologous arms on each side, the promoter is from <i>M. vannielli</i> SB                 | This study                |
| pPmcrR-uidA    | suicide plasmid containing " <i>P<sub>mcrR</sub>-uidA</i> " cassette, 1000 bp long homologous arms on each side, the promoter is from <i>M. vannielli</i> SB                | This study                |

|                 |                                                                                                                                                                                                                           |            |
|-----------------|---------------------------------------------------------------------------------------------------------------------------------------------------------------------------------------------------------------------------|------------|
| pPhdrC1-uidA    | suicide plasmid containing " <i>P<sub>hdrC1</sub>-uidA</i> " cassette, 1000 bp long homologous arms on each side, the promoter is from <i>M. vannielli</i> SB                                                             | This study |
| pPhdrC2-uidA    | suicide plasmid containing " <i>P<sub>hdrC2</sub>-uidA</i> " cassette, 1000 bp long homologous arms on each side, the promoter is from <i>M. vannielli</i> SB                                                             | This study |
| pPhdrA2-uidA    | suicide plasmid containing " <i>P<sub>hdrA2</sub>-uidA</i> " cassette, 1000 bp long homologous arms on each side, the promoter is from <i>M. vannielli</i> SB                                                             | This study |
| pPfdh-uidA      | suicide plasmid containing " <i>P<sub>fah</sub>-uidA</i> " cassette, 1000 bp long homologous arms on each side, the promoter is from <i>M. vannielli</i> SB                                                               | This study |
| pPeha-uidA      | suicide plasmid containing " <i>P<sub>eha</sub>-uidA</i> " cassette, 1000 bp long homologous arms on each side, the promoter is from <i>M. vannielli</i> SB                                                               | This study |
| pPeha w.TF-uidA | suicide plasmid containing " <i>P<sub>eha w.TF</sub>-uidA</i> " cassette, 1000 bp long homologous arms on each side, the promoter is from <i>M. vannielli</i> SB                                                          | This study |
| pPehb-uidA      | suicide plasmid containing " <i>P<sub>ehb</sub>-uidA</i> " cassette, 1000 bp long homologous arms on each side, the promoter is from <i>M. vannielli</i> SB                                                               | This study |
| pPglA-uidA      | suicide plasmid containing " <i>P<sub>glA</sub>-uidA</i> " cassette, 1000 bp long homologous arms on each side, the promoter is from <i>M. vannielli</i> SB                                                               | This study |
| pPnif-uidA      | suicide plasmid containing " <i>P<sub>nif</sub>-uidA</i> " cassette, 1000 bp long homologous arms on each side, the promoter is from <i>M. vannielli</i> SB                                                               | This study |
| pPmcr_JJ-uidA   | suicide plasmid containing " <i>P<sub>mcr_JJ</sub>-uidA</i> " cassette, 1000 bp long homologous arms on each side, the promoter is from <i>M. maripaludis</i> JJ                                                          | This study |
| pPmcrR_JJ-uidA  | suicide plasmid containing " <i>P<sub>mcrR_JJ</sub>-uidA</i> " cassette, 1000 bp long homologous arms on each side, the promoter is from <i>M. maripaludis</i> JJ                                                         | This study |
| pPfla_JJ-uidA   | suicide plasmid containing " <i>P<sub>fla_JJ</sub>-uidA</i> " cassette, 1000 bp long homologous arms on each side, the promoter is from <i>M. maripaludis</i> JJ                                                          | This study |
| pΔnrpR          | suicide plasmid containing deletion cassette of <i>nrpR</i> , a <i>P<sub>mcr</sub></i> promoter was placed between the homologous arms to drive the expression of <i>rlmE</i> , which is at the downstream of <i>nrpR</i> | This study |
| p005-380        | pMM005 containing guide sequences 5'-TATTGAGATGTGTTCCGGG targeting to <i>alr</i> (MMJJ_13260)                                                                                                                             | This study |
| p4.2k           | suicide plasmid containing a 4.2 kb insertion flanking with ca. 1000 bp upstream of <i>ald</i> (MMJJ_13250) and 1000 bp downstream of <i>alr</i> (MMJJ_13260)                                                             | This study |

**Table S2.** Strain list

| Strain | Genotype                                                                | Remarks                                                                                            | Reference                              |
|--------|-------------------------------------------------------------------------|----------------------------------------------------------------------------------------------------|----------------------------------------|
| S2     | wildtype                                                                | Used as PCR template for <i>upt</i> gene                                                           | <sup>6</sup>                           |
| SB     | <i>Methanococcus vannielii</i>                                          | Used as PCR template for promoters                                                                 | Purchased from DSMZ                    |
| A3     | <i>Methanococcus voltae</i>                                             | Used as PCR template for promoter and terminator for Cas protein expression                        | Provided by Prof. Whitman <sup>7</sup> |
| JJΔupt | Δupt                                                                    |                                                                                                    |                                        |
| JL1000 | Δupt Δfla(849-904)::gcggccgc with p002-218-L1000                        | JJΔupt was transformed with p002-218-L1000                                                         | This study                             |
| JL500  | Δupt Δfla(849-904)::gcggccgc with p002-218-L500                         | JJΔupt was transformed with p002-218-L500                                                          | This study                             |
| JL250  | Δupt Δfla(849-904)::gcggccgc with p002-218-L250                         | JJΔupt was transformed with p002-218-L250                                                          | This study                             |
| JD500  | Δupt Δfla(378-1379)::gcggccgc with p002-218-D500                        | JJΔupt was transformed with p002-218-D500                                                          | This study                             |
| JD1000 | Δupt ΔflaH (MMJJ_11580)(621-693)IJ(1-179)::gcggccgc with p002-218-D1000 | JJΔupt was transformed with p002-218-D1000                                                         | This study                             |
| J218U  | Δupt ΔflaB1B2B3CDEFGHIJ (MMJJ_11660 - MMJJ_11560)::uidA                 | JJΔupt was transformed with p002-218-uidA, plasmid was removed afterwards.                         | This study                             |
| J226U  | Δupt ΔflaB1B2B3CDEFGHIJ::uidA                                           | JJΔupt was transformed with p002-226-uidA, plasmid was removed afterwards.                         | This study                             |
| Jmtr   | Δupt Δacs(107-1075)::P <sub>mtr</sub> -uidA                             | JJΔupt was transformed with p002-253 and pP <sub>mtr</sub> -uidA, plasmid was removed afterwards.  | This study                             |
| Jmcr   | Δupt Δacs(107-1075)::P <sub>mcr</sub> -uidA                             | JJΔupt was transformed with p002-253 and pP <sub>mcr</sub> -uidA, plasmid was removed afterwards.  | This study                             |
| JmcrR  | Δupt Δacs(107-1075)::P <sub>mcrR</sub> -uidA                            | JJΔupt was transformed with p002-253 and pP <sub>mcrR</sub> -uidA, plasmid was removed afterwards. | This study                             |
| JhdrC1 | Δupt Δacs(107-1075)::P <sub>hdrC1</sub> -uidA                           | JJΔupt was transformed with p002-253 and pPhdrC1-uidA, plasmid was removed afterwards.             | This study                             |
| JhdrC2 | Δupt Δacs(107-1075)::P <sub>hdrC2</sub> -uidA                           | JJΔupt was transformed with p002-253 and pPhdrC2-uidA, plasmid was removed afterwards.             | This study                             |

|                    |                                                             |                                                                                                    |            |
|--------------------|-------------------------------------------------------------|----------------------------------------------------------------------------------------------------|------------|
| JhdrA2             | $\Delta upt \Delta acs(107-1075)::P_{hdrA2}-uidA$           | JJ $\Delta upt$ was transformed with p002-253 and pPhdrA2-uidA, plasmid was removed afterwards.    | This study |
| Jfdh               | $\Delta upt \Delta acs(107-1075)::P_{fdh}-uidA$             | JJ $\Delta upt$ was transformed with p002-253 and pPfdh-uidA, plasmid was removed afterwards.      | This study |
| Jeha               | $\Delta upt \Delta acs(107-1075)::P_{eha}-uidA$             | JJ $\Delta upt$ was transformed with p002-253 and pPeha-uidA, plasmid was removed afterwards.      | This study |
| Jehawtf            | $\Delta upt \Delta acs(107-1075)::P_{eha\ w.TF}-uidA$       | JJ $\Delta upt$ was transformed with p002-253 and pPeha w.TF-uidA, plasmid was removed afterwards. | This study |
| Jehb               | $\Delta upt \Delta acs(107-1075)::P_{ehb}-uidA$             | JJ $\Delta upt$ was transformed with p002-253 and pPehb-uidA, plasmid was removed afterwards.      | This study |
| JglnA              | $\Delta upt \Delta acs(107-1075)::P_{glnA}-uidA$            | JJ $\Delta upt$ was transformed with p002-253 and pPglnA-uidA, plasmid was removed afterwards.     | This study |
| Jnif               | $\Delta upt \Delta acs(107-1075)::P_{nif}-uidA$             | JJ $\Delta upt$ was transformed with p002-253 and pPnif-uidA, plasmid was removed afterwards.      | This study |
| JmcrJ              | $\Delta upt \Delta acs(107-1075)::P_{mcr\_JJ}-uidA$         | JJ $\Delta upt$ was transformed with p002-253 and pPmcr_JJ-uidA, plasmid was removed afterwards.   | This study |
| JmcrRJ             | $\Delta upt \Delta acs(107-1075)::P_{mcrR\_JJ}-uidA$        | JJ $\Delta upt$ was transformed with p002-253 and pPmcrR_JJ-uidA, plasmid was removed afterwards.  | This study |
| JflaJ              | $\Delta upt \Delta acs(107-1075)::P_{fla\_JJ}-uidA$         | JJ $\Delta upt$ was transformed with p002-253 and pPfla_JJ-uidA, plasmid was removed afterwards.   | This study |
| Jnif $\Delta nrpR$ | $\Delta upt \Delta nrpR \Delta acs(107-1075)::P_{nif}-uidA$ | Jnif was transformed with p002-247 and p $\Delta nrpR$                                             | This study |

**Table S3.** Plasmid maps

| <b>Plasmid</b>  | <b>link</b>                                                                                                                                                             |
|-----------------|-------------------------------------------------------------------------------------------------------------------------------------------------------------------------|
| pMM002P         | <a href="https://benchling.com/s/seq-NcNgENuHGpjcjuVSBu0e?m=slm-uWqdWXhT0CNxlHaCyTYG">https://benchling.com/s/seq-NcNgENuHGpjcjuVSBu0e?m=slm-uWqdWXhT0CNxlHaCyTYG</a>   |
| pMM005          | <a href="https://benchling.com/s/seq-hvquLQ7RbCe0LrHLvgUG?m=slm-Uljuux0W4UWZCD8H0Ube">https://benchling.com/s/seq-hvquLQ7RbCe0LrHLvgUG?m=slm-Uljuux0W4UWZCD8H0Ube</a>   |
| p002-218        | <a href="https://benchling.com/s/seq-95SMUqzI7CM8HY637Tej?m=slm-nJXd3LjQAAQGNstiyv0">https://benchling.com/s/seq-95SMUqzI7CM8HY637Tej?m=slm-nJXd3LjQAAQGNstiyv0</a>     |
| p002-226        | <a href="https://benchling.com/s/seq-IsoPOqfmcoajKn9cMy8o?m=slm-KeQfniz32M9QIHnTm6ob">https://benchling.com/s/seq-IsoPOqfmcoajKn9cMy8o?m=slm-KeQfniz32M9QIHnTm6ob</a>   |
| p002-218-L1000  | <a href="https://benchling.com/s/seq-OzWgU1lZMoUM48r8Jnli?m=slm-4wjgalWGU6q2jfQJBPjy">https://benchling.com/s/seq-OzWgU1lZMoUM48r8Jnli?m=slm-4wjgalWGU6q2jfQJBPjy</a>   |
| pPmtr-uidA      | <a href="https://benchling.com/s/seq-0Gomnk1heQqOZcCU6GRn?m=slm-dHi8kpnVmpgyZ1LyXbNf">https://benchling.com/s/seq-0Gomnk1heQqOZcCU6GRn?m=slm-dHi8kpnVmpgyZ1LyXbNf</a>   |
| pPmcr-uidA      | <a href="https://benchling.com/s/seq-W11SbMBtaTdab5nlcUC9?m=slm-gmg7fHunlevaxHSKpRlf">https://benchling.com/s/seq-W11SbMBtaTdab5nlcUC9?m=slm-gmg7fHunlevaxHSKpRlf</a>   |
| pPmcrR-uidA     | <a href="https://benchling.com/s/seq-zpHKgTXargZcOH0sg26M?m=slm-b8KraXsjOZP1H77qM22N">https://benchling.com/s/seq-zpHKgTXargZcOH0sg26M?m=slm-b8KraXsjOZP1H77qM22N</a>   |
| pPhdrC1-uidA    | <a href="https://benchling.com/s/seq-7vfw1HM5KaJn0JQZxqKr?m=slm-ACTIrP1pfkZrR5MR2y0T">https://benchling.com/s/seq-7vfw1HM5KaJn0JQZxqKr?m=slm-ACTIrP1pfkZrR5MR2y0T</a>   |
| pPhdrC2-uidA    | <a href="https://benchling.com/s/seq-GECSScdMhnf9XM0i7dH?m=slm-bFOEK8QlLhtSH4lvUW21">https://benchling.com/s/seq-GECSScdMhnf9XM0i7dH?m=slm-bFOEK8QlLhtSH4lvUW21</a>     |
| pPhdrA2-uidA    | <a href="https://benchling.com/s/seq-Jwx0H7YJcMCzA42eJPF6?m=slm-cwKcM0LkKbQLv1cN4llaC">https://benchling.com/s/seq-Jwx0H7YJcMCzA42eJPF6?m=slm-cwKcM0LkKbQLv1cN4llaC</a> |
| pPfdh-uidA      | <a href="https://benchling.com/s/seq-DOMwbRZ6WALbE3SHTTMF?m=slm-sUQWlj4qbdmmL74pSb1Q">https://benchling.com/s/seq-DOMwbRZ6WALbE3SHTTMF?m=slm-sUQWlj4qbdmmL74pSb1Q</a>   |
| pPeha-uidA      | <a href="https://benchling.com/s/seq-vPCMYrXjr9PiLKxHatOs?m=slm-UbgyKGuyakFfSQ4STIse">https://benchling.com/s/seq-vPCMYrXjr9PiLKxHatOs?m=slm-UbgyKGuyakFfSQ4STIse</a>   |
| pPeha w.TF-uidA | <a href="https://benchling.com/s/seq-TtXDra2oDlyADm8eS7ns?m=slm-CEUoenlUGVfMb8BPeabC">https://benchling.com/s/seq-TtXDra2oDlyADm8eS7ns?m=slm-CEUoenlUGVfMb8BPeabC</a>   |
| pPehb-uidA      | <a href="https://benchling.com/s/seq-tDXok4O6Ric798CaMapy?m=slm-Hd9WyxMjMk7omegb0obG">https://benchling.com/s/seq-tDXok4O6Ric798CaMapy?m=slm-Hd9WyxMjMk7omegb0obG</a>   |
| pPglNA-uidA     | <a href="https://benchling.com/s/seq-RcddggPTElJMqlZ2s6Eh?m=slm-JKc8i5HNtjdRbuw51yn1">https://benchling.com/s/seq-RcddggPTElJMqlZ2s6Eh?m=slm-JKc8i5HNtjdRbuw51yn1</a>   |
| pPnif-uidA      | <a href="https://benchling.com/s/seq-iaa8yge2Lqaj3XpOOct0Y?m=slm-e7qq4iYbyZtirETKuQt0">https://benchling.com/s/seq-iaa8yge2Lqaj3XpOOct0Y?m=slm-e7qq4iYbyZtirETKuQt0</a> |
| pPmcr_JJ-uidA   | <a href="https://benchling.com/s/seq-6sP4BHn8cSssampgokXB?m=slm-GELjQGAhiabG2JUlaKCl">https://benchling.com/s/seq-6sP4BHn8cSssampgokXB?m=slm-GELjQGAhiabG2JUlaKCl</a>   |
| pPmcrR_JJ-uidA  | <a href="https://benchling.com/s/seq-3wN9rk0VvzFd5cZO1UxY?m=slm-aHvtqEanTqm85apTBcJm">https://benchling.com/s/seq-3wN9rk0VvzFd5cZO1UxY?m=slm-aHvtqEanTqm85apTBcJm</a>   |
| pPfla_JJ-uidA   | <a href="https://benchling.com/s/seq-D6xKkW9YqDEBlvTbz046?m=slm-68Z2g0Tdg8d9wlolLIAX">https://benchling.com/s/seq-D6xKkW9YqDEBlvTbz046?m=slm-68Z2g0Tdg8d9wlolLIAX</a>   |
| pΔnrpR          | <a href="https://benchling.com/s/seq-ZaGqJIBsQxrGJb9RARmb?m=slm-APrpwwhfkbpBKSUMw7Qs">https://benchling.com/s/seq-ZaGqJIBsQxrGJb9RARmb?m=slm-APrpwwhfkbpBKSUMw7Qs</a>   |

**Table S4.** Primers used for pMM002P construction

| Frag ment | Subfrag ment | Primer | Sequence (5'->3')                                                          | Template                                                                        |                                         |
|-----------|--------------|--------|----------------------------------------------------------------------------|---------------------------------------------------------------------------------|-----------------------------------------|
| F1        |              | P1     | CTTCTTCAGGGAGCTCGAGATAAGAATTACTAGATCGGAAAATT<br>CAGTAATGCAAAAACAC          | <i>Methano<br/>coccus<br/>voltae</i> A3                                         |                                         |
|           |              | P2     | TTTAATTAAGTATTTTAATTATTCTTTTTTCATTATTTTATTAAGTT<br>ATTAC                   |                                                                                 |                                         |
| F2        | F2.1         | P3     | GTAATAACTTAATAAAATAATGAAAAAGAATAATTAATAACT<br>TAATTAATTAGCTGGTCTGGGCGTACTC | pY016                                                                           |                                         |
|           |              | P4     | GCCCTGATGAGCCTGATGCTTCAGATGCGGAACAGCATCAC                                  |                                                                                 |                                         |
|           | F2.2         | P5     | GTGATGCTGTTCCGCATCTGAAGCATCAGGCTCATCAGGGC                                  | pY016                                                                           |                                         |
|           |              | P6     | GTGAAGGTGGAGAAGCAGGTTTATCAGAAGTTCGAGAAGATGC<br>TG                          |                                                                                 |                                         |
|           | F2.3         | P7     | CAGCATCTTCTCGAACTTCTGATAAACCTGCTTCTCCACCTTCAC                              | pY016                                                                           |                                         |
|           |              | P8     | GGATAAGAAGTACGCCAAGTGCTTACAGAAGATCGACAAGGAC<br>GATG                        |                                                                                 |                                         |
|           | F2.4         | P9     | CATCGTCCTTGTCGATCTTCTGTAAGCACTGGCGTACTTCTTATC<br>C                         | pY016                                                                           |                                         |
|           |              | P10    | CCTCAAGAAGATCGGCTCCTTTTCTTTAGAGCAGTTACAGGAGT<br>ACGCCGACGCCG               |                                                                                 |                                         |
|           | F2.5         | P11    | CGGCGTCGGGCTACTCCTGTAAGTCTCTAAAGAAAAGGAGCCG<br>ATCTTCTTGAAGG               | pY016                                                                           |                                         |
|           |              | P12    | GTTAAGCCACTGTATAAGCAGGTTCTGAGCGATCGGGAGTCTC<br>TG                          |                                                                                 |                                         |
|           | F2.6         | P13    | CAGAGACTCCCAGTCGCTCAGAACCTGCTTACAGTGGCTTAA<br>AC                           | pY016                                                                           |                                         |
|           |              | P14    | ATATATATACCTATATAGTGTGAGGTGTAATAATATGAGCAAG<br>CTGGAGAAGTTTAC              |                                                                                 |                                         |
|           | F3           | F3.1   | P15                                                                        | ATTATTACACCTCGACACTATATAGGTATATATAT                                             | <i>Methano<br/>coccus<br/>voltae</i> A3 |
|           |              |        | P16                                                                        | GTTATATTTTGATCGATCAGCTGAATTAACGCCGGCGAATTTTAT<br>TAAATTATCATATAACTATATAAATTTATC |                                         |
| F3.2      |              | P17    | AATTCGCCGGCGTTAATTCAGCTGATCGATCAAAAATAAAC                                  | pMEV4                                                                           |                                         |
|           |              | P18    | CAATGCAGGTGCGGATCCTCACCTGCGCATATCTACACTTAGTA<br>GAAATTCCTTAGTATTAG         |                                                                                 |                                         |
| F3.3      |              | P19    | ATGCGCAGGTGAGGATCCGCACCTGCATTGGATATAGCAAAAG<br>TGGGACTTAAGTTCC             | pMEV4m<br>Ts                                                                    |                                         |
|           |              | P20    | GGAAGGTCGTCTCCTCTAGT                                                       |                                                                                 |                                         |
| F3.4      |              | P21    | AACTAGAGGAGACGACCTTCCATGATAAAAGATGAAAGATGG<br>GAAGGAG                      | <i>Methanc<br/>occus<br/>maripalu<br/>dis</i> S2                                |                                         |
|           |              | P22    | GTTGGTTTATATTCTGTCATGCATTTACCTATTTTATTCTAAATT<br>GTGCATTTGTGGGAGC          |                                                                                 |                                         |
| F3.5      |              | P23    | AATAGGTGAAATGCATGACAGAATATAAACCAACAGTTAGATTA<br>GC                         | pMEV4                                                                           |                                         |
|           |              | P24    | CGGCTTCGGTCGGAGCCATGGTTATGCTCCTGGTTTTCTTGTCAT<br>AC                        |                                                                                 |                                         |

The fragment F1, subfragments F2.1 to F2.6, and F3.1 to F3.5 were amplified by normal PCR.

The fragments F2 and F3 were constructed by jointing F2.1 to F2.6 and F3.1 to F3.5 together by overlap PCR. pMM002P was constructed by assembling NcoI/BcuI digested pLW40, F1, F2, F3 by Gibson cloning<sup>8</sup>.

**Table S5.** Primers used for pMM005 construction

| Frag ment | Subfrag ment | Primer | Sequence (5'->3')                                                                                                               | Template                                    |
|-----------|--------------|--------|---------------------------------------------------------------------------------------------------------------------------------|---------------------------------------------|
| F1        |              | P1     | CTTCTTCAGGGAGCTCGAGATAAGAATTACTAGATCGGAAA<br>ATTCAGTAATGCAAAAACAC                                                               | <i>Methanococ<br/>cus voltae</i> A3         |
|           |              | P2     | TTAATTAAGTATTTTAATTATTCTTTTTTCATTATTTTATTAAG<br>TTATTAC                                                                         |                                             |
| F4        | F4.1         | P25    | GTAATAACTTAATAAAATAATGAAAAAGAATAATTAATA<br>CTTAATTAATTAGTCGCCTCCAGCTGAG                                                         | pX165                                       |
|           |              | P26    | GAGAATGCTGGCCTCTGCCGCGAACTTCAGAAGGGAAACG<br>AACTGG                                                                              |                                             |
|           | F4.2         | P27    | AGGGCCAGTTTCGTTTCCCTTCTGAAGTTTCGCCGCAGAGGCC                                                                                     | pX165                                       |
|           |              | P28    | GAAAACACCCAGCTTCAGAACGAGAAGCTGTACCTGTACTA<br>CCTTCAGAATGGGCGGGATATGTAC                                                          |                                             |
|           | F4.3         | P29    | CTGAAGGTAGTACAGGTACAGCTTCTCGTTCTGAAGCTGGG<br>TGTTTTCCACGG                                                                       | pX165                                       |
|           |              | P30    | AGCCCCGCCATTAAGAAGGGCATCCTTCAGACAGTGAAGGT<br>GGTGG                                                                              |                                             |
|           | F4.4         | P31    | CTCGTCCACCACCTTCACTGTCTGAAGGATGCCCTTCTTAATG<br>GC                                                                               | pX165                                       |
|           |              | P32    | ACCTGGCCGAGGATGCCAACTTCAGCTGAGCAAGGACACC<br>TAC                                                                                 |                                             |
|           | F4.5         | P33    | GTCGTCGTAGGTGTCCTTGCTCAGCTGAAGTTTGGCATCCTC<br>GGCCAG                                                                            | pX165                                       |
|           |              | P34    | CATCAATCCATATATTATATATACCTATATAGTGTGAGGT<br>GTAATAATATGGACAAGAAGTACAGCATCG                                                      |                                             |
| F5        | F3.1         | P15    | ATTATTACACCTCGACACTATATAGGTATATATAT                                                                                             | <i>Methanococ<br/>cus voltae</i> A3         |
|           |              | P16    | GTTATATTTTGATCGATCAGCTGAATTAACGCCGGCGAATTT<br>TATTAATATCATATAACTATATAAATTTATC                                                   |                                             |
|           | F5.1         | P17    | AATTCGCCGGCGTTAATTCAGCTGATCGATCAAAATATAAC                                                                                       | pMEV4                                       |
|           |              | P35    | TGATAACGGACTAGCCTTATTTAACTTGCTATTTCTAGCTCT<br>AAAACCAATGCAGGTGCGGATCCTCACCTGCGCATCACTCTA<br>GTATTAGTTATCTATAAAATTATAATATCAATAGC |                                             |
|           | F5.2         | P36    | AGCAAGTTAAAATAAGGCTAGTCCGTTATCAACTGAAAAA<br>GTGGCACCGAGTCGGTGCTTTTGATATAGCAAAAGTGGGAC<br>TTAAGTTCCC                             | pMEV4mTs                                    |
|           |              | P20    | GGAAGGTCGTCTCCTCTAGT                                                                                                            |                                             |
|           | F3.4         | P21    | AACTAGAGGAGACGACCTTCCATGATAAAAGATGAAAGAT<br>GGGAAGGAG                                                                           | <i>Methanococ<br/>cus maripaludis</i><br>S2 |
|           |              | P22    | GTTGGTTTATATTCTGTCATGCATTTACCTATTTTATTCTAAA<br>TTGTGCATTTGTGGGAGC                                                               |                                             |
|           | F3.5         | P23    | AATAGGTGAAATGCATGACAGAATATAAACCAACAGTTAGA<br>TTAGC                                                                              | pMEV4                                       |
|           |              | P24    | CGGCTTCGGTCGGAGCCATGGTTATGCTCCTGGTTTTCTTGT<br>CATAC                                                                             |                                             |

The subfragments F4.1 to F4.5, and F5.1 to F5.2 were amplified by normal PCR. The fragments F4 and F5 were constructed by jointing F4.1 to F4.5 and F3.1, F5.1, F5.2, F3.4 and F3.5 together by overlap PCR. pMM005 was constructed by assembling NcoI/BcuI digested pLW40, F1, F4, F5 by Gibson cloning<sup>8</sup>.



**Table S6.** The rest of primers used in this study

| Primer | Sequence (5'→3')                                                                                              |                                                |
|--------|---------------------------------------------------------------------------------------------------------------|------------------------------------------------|
| CR227  | GCTTATAATGTTTTAATTTTTAAAAACAGATAAATTTATATAGTTATATGATAAT<br>TTAATAAAAATTCGCCCAAATTTTGAATGAATATGTGGAGTCTTTCATTT | L1000                                          |
| CR228  | GTACAATGTCTGCTCAGACTGCGCGCCGCCTGCGTCAGGAAAACTACTTC                                                            |                                                |
| CR229  | GAAGTAGTTTTCTGACGCAGGCGGCCGCGCAGTCTGAGCAGACATTGTAC                                                            |                                                |
| CR230  | GTTATTTATGTTATATTTTGATCGATCAGCTGAATTAACGCCGGCAACTTATTCTT<br>TCGGGGGAAATC                                      |                                                |
| CR231  | GCTTATAATGTTTTAATTTTTAAAAACAGATAAATTTATATAGTTATATGATAAT<br>TTAATAAAAATTCGCCGACCGCTGTCTATTGAATAAGC             | D250                                           |
| CR232  | GAATGGGAAGATGAAGGGGACGCGGCCGCGGTCTGTGAAGGAGCTGTTG                                                             |                                                |
| CR233  | CAACAGCTCCTTCGACAGACCGCGGCCGCGTCCCCTTCATCTCCCATTC                                                             |                                                |
| CR234  | GTTATTTATGTTATATTTTGATCGATCAGCTGAATTAACGCCGGGCATACAAGAG<br>CATTTTATGAAAAAGATATTG                              |                                                |
| CR235  | GCTTATAATGTTTTAATTTTTAAAAACAGATAAATTTATATAGTTATATGATAAT<br>TTAATAAAAATTCGCCTTTATCGCATAGACCAAAGTACTTC          | D500                                           |
| CR236  | CATGGTTGCAAAAAGTATCAAGTCAGCGGCCGCCATTACAAGAGGTGTTTTTGAA<br>TGG                                                |                                                |
| CR237  | CCATTCAAAAACACCTCTTGAATGGCGGCCGCTGACTTGATACTTTTGCAACCA<br>TG                                                  |                                                |
| CR238  | GTTATTTATGTTATATTTTGATCGATCAGCTGAATTAACGCCGGTCTTAATTGAAG<br>GAGAAGAGTCATCC                                    |                                                |
| CR239  | GCTTATAATGTTTTAATTTTTAAAAACAGATAAATTTATATAGTTATATGATAAT<br>TTAATAAAAATTCGCCCCATTCAAAAACACCTCTTGAATGAC         | L500 (amplified<br>with CR228 and<br>CR229)    |
| CR240  | GTTATTTATGTTATATTTTGATCGATCAGCTGAATTAACGCCGGTTGACATGGTT<br>GCAAAAAGTATCAAG                                    |                                                |
| CR241  | GCTTATAATGTTTTAATTTTTAAAAACAGATAAATTTATATAGTTATATGATAAT<br>TTAATAAAAATTCGCCAAAGCAACAGCTCCTTCGAC               | L250<br>(amplified with<br>CR228 and<br>CR229) |
| CR242  | GTTATTTATGTTATATTTTGATCGATCAGCTGAATTAACGCCGGCAAACATTGAA<br>TGGGAAGATGAAG                                      |                                                |
| CR243  | GCTTATAATGTTTTAATTTTTAAAAACAGATAAATTTATATAGTTATATGATAAT<br>TTAATAAAAATTCGCCATTTTAGACGTATTTTCGTGAGTTC          | <i>P<sub>fla-JJ-uidA-T<sub>fla</sub></sub></i> |
| CR244  | GGGGTTTCTACAGGACGTAACATGATTGAACCTCCTAAGTTCACCAG                                                               |                                                |
| CR245  | CAGCAGGGAGGCAAACAATGATTTATTTAAAAAATCATTTGAATAGTGAACCG                                                         |                                                |
| CR246  | GTTATTTATGTTATATTTTGATCGATCAGCTGAATTAACGCCGGCAGTTCCAAA<br>TTTCAACATTTTATCAC                                   |                                                |
| E275   | ATGTTACGTCCTGTAGAAACCCC                                                                                       |                                                |
| CR31   | TCATTGTTTGCCTCCCTGCTG                                                                                         |                                                |
| CR394  | GGAGAGCAGGCAAATGTTTAGCTTTTTACCACCTGAAAGAAAACTTATAC                                                            | <i>P<sub>nif</sub></i>                         |
| CR395  | GGGGTTTCTACAGGACGTAACATACTAAAGCCTCTATTGCATCATC                                                                |                                                |
| CR396  | GGAGAGCAGGCAAATGTTTAGCTCTATGAATATTTAAGGAGGCCTTTTGG                                                            | <i>P<sub>mtr</sub></i>                         |
| CR398  | GGGGTTTCTACAGGACGTAACATTATTTACCTCACAATATACGGGAATG                                                             |                                                |
| CR399  | GGAGAGCAGGCAAATGTTTAGATTACCATCTTATTTACTTTTATAAAAATAGTA<br>GTAAGTAG                                            | <i>P<sub>mcr</sub></i>                         |
| CR400  | GGGGTTTCTACAGGACGTAACATAGGAACCACTCCTATTTTTTTGATATATACAT<br>C                                                  |                                                |
| CR401  | GGAGAGCAGGCAAATGTTTAGAGGAACCACTCCTATTTTTTTGATATATAC                                                           | <i>P<sub>mcrR</sub></i>                        |
| CR402  | GGGGTTTCTACAGGACGTAACATATTACCATCTTATTTACTTTTATAAAAATAGTA<br>GTAAGTAG                                          |                                                |

|            |                                                                         |                                                                                               |
|------------|-------------------------------------------------------------------------|-----------------------------------------------------------------------------------------------|
| CR403      | GGAGAGCAGGCAAAATGTTTAGAAGAGCATAGTTTATATCGTTTATACCATC                    | <i>P<sub>hdrC2</sub></i>                                                                      |
| CR404      | GGGGTTTCTACAGGACGTAACATCAGTAACACCTCGAGGATACTTTTG                        |                                                                                               |
| CR405      | GGAGAGCAGGCAAAATGTTTAGGCACCCGATTTCAACAACC                               | <i>P<sub>hdrC1</sub></i>                                                                      |
| CR406      | GGGGTTTCTACAGGACGTAACATTCGCTTCACCTCCCTTATAGTTTAATTTTTC                  |                                                                                               |
| CR407      | GGAGAGCAGGCAAAATGTTTAGGAAATCCCTCGCACATAGAGAAC                           | <i>P<sub>hdrA2</sub></i>                                                                      |
| CR408      | GGGGTTTCTACAGGACGTAACATGGATTACCTCCACATATAACAAGTAAG                      |                                                                                               |
| CR411      | GGAGAGCAGGCAAAATGTTTAGCTGTGAAGAAAGAAACGTTATAGATGG                       | <i>P<sub>fdh</sub></i>                                                                        |
| CR412      | GGGGTTTCTACAGGACGTAACATTAATCATCACCGTTAAATTATGTGTGAC                     |                                                                                               |
| CR413      | GGAGAGCAGGCAAAATGTTTAGAAAAAATCACCTTAATCAAATTTTGAAAAATGC                 | <i>P<sub>eha</sub></i>                                                                        |
| CR414      | GGGGTTTCTACAGGACGTAACATTTTACCACGATTTAGTCTACAAGACTTTAAAT<br>TATTTT       |                                                                                               |
| CR414<br>L | GGGGTTTCTACAGGACGTAACATTAATATCACCAGCAGTGTACAATCATAAC                    | <i>P<sub>eha w.TF</sub></i> (amplified<br>with CR413)                                         |
| CR419      | GGAGAGCAGGCAAAATGTTTAGGTCTATCACACAAAAGGGATTTTTGTAATG                    | <i>P<sub>ehb</sub></i>                                                                        |
| CR420      | GGGGTTTCTACAGGACGTAACATATTACCACCAATCGGGACTAAAAATTTG                     |                                                                                               |
| CR421      | GGAGAGCAGGCAAAATGTTTAGTAAATCACCGTGAATTTGCGAATAATTTT                     | <i>P<sub>glnA</sub></i>                                                                       |
| CR422      | GGGGTTTCTACAGGACGTAACATATATATTTCTCCAAAATCATCTTTATAGGAAA<br>TAGC         |                                                                                               |
| CR467      | GGAGAGCAGGCAAAATGTTTAGTTTATAGATTCCCAGTGTTCAAATGC                        | <i>P<sub>fla_JJ</sub></i> (amplified<br>with CR244)                                           |
| CR468      | GGAGAGCAGGCAAAATGTTTAGATTACCATCTTATTTAGCTTTATAAAAATAGTA<br>ATC          | <i>P<sub>mcr_JJ</sub></i> (amplified<br>with CR400)                                           |
| CR469      | GGGGTTTCTACAGGACGTAACATATTACCATCTTATTTAGCTTTATAAAAATAGT<br>AATC         | <i>P<sub>mcrR_JJ</sub></i> (amplified<br>with CR401)                                          |
| CR416      | CAAAAGTGGGACTTAAGTTCCCACTTTTGCTATTGATTATCAACATTGAGGCTTT<br>TAGG         | For suicide<br>plasmid<br>construction incl.<br>homologous<br>arms, <i>uidA</i> and<br>vector |
| CR417      | GTGCACCAAGGATCTTCACCTAGAAGTGTAGATGTTCTAAAAGATAATGATT<br>ATTTAGTATTTG    |                                                                                               |
| CR418      | GTTCTGGCCTTTTGCTGGCCAAGCTTATTGTAAATTATGCCTCCAAGGGTG                     |                                                                                               |
| CR298      | CTAAACATTTTGCCTGCTCTCC                                                  |                                                                                               |
| CR415      | GGGAECTTAAGTCCCCTTTTGCTATATCTCATTGTTTGCCTCCCTGCTG                       |                                                                                               |
| SV-F       | TCTAGGTGAAGATCCTTGGTGAC                                                 |                                                                                               |
| SV-R       | GGCCAGCAAAAGGCCAGGAAC                                                   |                                                                                               |
| CR426      | GTTCTGGCCTTTTGCTGGCCAAGCTTGGATTACCTGTTGTTATGTATTCATTTA<br>CC            | $\Delta$ NrpR                                                                                 |
| CR427      | GTATATTACGAATAGGGCGTTTTTTTATTTATAAAATGGATAAAATTTCAACATCA<br>ATATTACTGTC |                                                                                               |
| CR428      | GAAATTTTATCCATTTTATAAATAAAAAACGCCCTATTCGTAATATACTATTC                   |                                                                                               |
| CR429      | GGAAGTCTGCTCCTCTAGTTTTTTTTGATATATACATCATAACATTACTCTATG                  |                                                                                               |
| CR430      | ACTAGAGGAGACGACCTTCATGGGAAAAAAGGACAAAAGATGG                             |                                                                                               |
| CR431      | GTGCACCAAGGATCTTCACCTAGAAGTGCATTTTACGTTTACGGAAAAACTGTT<br>TC            |                                                                                               |

## Supplementary Methods

Additional details for utilizing the CRISPR/Cas genome-editing toolbox in *M. maripaludis* are provided below:

**CRISPR/Cas plasmids and their functional elements.** CRISPR/Cas plasmids are designed and constructed to contain expression cassettes for gRNAs and Cas proteins, either *Lachnospiraceae bacterium* (Lb) Cas12a as in pMM002 or *Streptococcus pyogenes* (Sp) Cas9 as in pMM005. Both of the CRISPR/Cas plasmids also contain the following elements: ampicillin (*amp*) and puromycin (*pac*) resistance genes for selection in *E. coli* and *M. maripaludis*, respectively, a suicide gene (*upt*) for rapid removal of plasmids from *M. maripaludis*, and respective ori sequences for autonomous replication in either *E. coli* or *M. maripaludis*. The gRNA included is made up of a fixed sequence that will be bound by the Cas protein, plus a non-sense sequence that is meant to be substituted according to the genomic DNA sequence that is going to be targeted. Upon digestion with *PaqCI*, the non-sense sequence from this gRNA is removed, and two sticky ends are created. Thus, the genome-targeting gRNA sequence that is to be designed must be flanked by these sticky ends as well.

**Design of gRNA sequences via the CHOPCHOP webtool.** Obtaining genome-targeting gRNA sequence necessitates designing two single-stranded oligonucleotide primers, which is accomplished by following the CHOPCHOP step-by-step instructions (<https://chopchop.cbu.uib.no/>). For this, the gene name (including RefSeq and ENSEMBL gene IDs) or the pasted nucleotide sequence of interest is entered as the target and the *M. maripaludis* JJ (DSM 2067) strain is selected as the reference genome. The type of Cas protein (CRISPR mode) is then selected, and the advanced options display is opened. For LbCas12a (Cpf1), 20-24 and TTTN are entered for the sgRNA length without PAM and the 5'-PAM, respectively. For SpCas9, 20 and NGG are entered for the sgRNA length without PAM and the PAM-3', respectively. CHOPCHOP output will list several suitable gRNA sequences for CRISPR editing within the nucleotide sequence of interest. It is recommended to select three of the top 10 gRNA sequences. Two oligonucleotide primers are designed based on these sequences without the 5'-PAM. The forward primer consists of the complementary nucleotide sequence of the forward cohesive end site (established by *PaqCI* digestion on pMM002P or pMM005), followed by the nucleotide sequence provided by CHOPCHOP. The reverse primer is fashioned in a similar manner, consisting of the reverse complementary sequence of the reverse cohesive end site (established by *PaqCI* digestion on pMM002P or pMM005), followed by the reverse complementary sequence of the nucleotide sequence provided by CHOPCHOP. Forward and reverse primers are annealed, with the resulting double-stranded DNA fragment then ligated into the plasmid (pMM002P or pMM005) backbone via the *PaqCI* cohesive ends. Provided below are examples of the above-mentioned components.

Nucleotide sequence of gRNA with the 5'-PAM underlined:

**TTTNAAAATTTTCCCCGGGAAAA**

Forward oligonucleotide primer:

**5'-AGATAAAATTTTCCCCGGGAAAA**

Reverse oligonucleotide primer:

5'-TATCTTTTCCCCGGGAAAATTT

5'- and 3'-overhanging *Paq*CI cohesive ends in the plasmid backbone:

5'- ....NNNN // GATANNNN....  
3'- ....NNNNTCTA // NNNN....

**Repair fragment (RF) insertion.** The RF is introduced into *M. maripaludis* cells separately as a suicide plasmid or PCR fragment, or else by being included within the CRISPR/Cas plasmid. For the latter option, the presence of an *Mre*I restriction site between the gRNA and Cas elements will facilitate RF insertion.

**Quick natural transformation protocol<sup>7</sup> in *M. maripaludis*:**

1. Grow a 5 mL of *M. maripaludis* culture in McC medium until OD between 0.7 and 1.2 is reached. The freshness of the seed culture used to inoculate the culture to be transformed positively affects the transformation efficiency.
2. Once the desired OD is reached, add 2  $\mu\text{g}$  of the CRISPR plasmid (plus 2  $\mu\text{g}$  of the linear repair fragment or the suicide plasmid, if provided separately).
3. Flush the culture with 80% H<sub>2</sub>, 20% CO<sub>2</sub>, for 0.5 min, and pressurize the culture to 2.8 bar (absolute pressure).
4. Incubate the culture on a shaker at 37°C, 200 rpm, for 4 hours.
5. Plate an appropriate amount on McC medium with puromycin.

## Promoter sequences used in this study

*P<sub>mtr</sub>* from *Methanococcus vannielii* SB

tcctatgaatattaaggaggccttttgcttcctttttatacctattatatattgttcggaatcattaacaatattgctaataaaatata  
cttaataaattaaaggaaaattaggctttgttttttaaaaaacgaatgcaaagtaatatatagataacaagatattaactgatta  
gctaacggcatagataacgttctaggctttaagccactagaagtcataagctaacattcccgtatattgtgaggtgaaata

*P<sub>mcr</sub>* from *Methanococcus vannielii* SB

attaccatcttattacttttataaaaatagtagtaagtagtaattcattaataaaatagaattccaatattagttttgtcatgctaattaca  
atztatctagtattacgtagcatgataagataaataacctaatacaaaaactaatccccgatagagactatatatattttctatttgatt  
ttaatgaaaactgaatatacttctttaataatgttatgatgatataatcaaaaaataggagtggtcct

*P<sub>mcrR</sub>* from *Methanococcus vannielii* SB

aggaaccactcctattttttgatatacatcatacattattaaggaagatatattcaagttttcattaatacaaatagaaaaat  
atatagtctctatcggggattaagttttggattaggtaattatcttatcatgctacgtaatactagataaattgtaattgcatgaca  
aaaactaatattggaattctatttttaatagaattactactactattttataaaaagtaataagatggtta

*P<sub>eha</sub>* from *Methanococcus vannielii* SB

aaaaatcaccttaatacaattttgaaaatgctacttacctaagtaaaagactatgttctcataacataaaaaaatttatacatatcttaa  
ttttcgacttgaaccaagtaataaaatataatacaaaaatccctcaagaataatgttattcttatgaataatttaaagtctttagacta  
aatcgtggtaaa

*P<sub>eha w. TF</sub>* from *Methanococcus vannielii* SB

Aaaaaatcaccttaatacaattttgaaaatgctacttacctaagtaaaagactatgttctcataacataaaaaaatttatacatatcttaa  
attttcgacttgaaccaagtaataaaatataatacaaaaatccctcaagaataatgttattcttatgaataatttaaagtctttagact  
aatcgtggtaaaatgtacgacaaattaaagatttgaaggcattcttttaaacccggaacatacaaggttttcgtgaaaagct  
caaaattaccagtcaaaacttctgaagaagtggtgtaagtcaatcacacctaagtagcttgaaaagggtaaacgggatactgga  
gaagctcatgctcgcgaataacacttggaaatgcttaaatgtagtaatgcatgggataaagaagaccaatactatatcttttagactg  
ttatcgcttacaagtttagaaagcgccattgtatcgtttataagagatttgactacaacaacagattctttacaggagatttattgaa  
ggcatcctgtatattgtagataaaaccaattttctgaagaaattaaagagactaaaagtaatacgaagaagatcctttt  
ttaggggcccggatggaattaaaggaatacatttggataaaaaacagtagtaataagtttgattgctcagatattcgttagactgaa  
aaaaaggtctctgatgtactttcaataatacagataatacagatatttccaaaagacgaaattcccccaatatattctataaaaaagaa  
tgtatgattgtacactgctggtgatatta

The coding sequence of the putative transcription factor is underlined.

*P<sub>ehb</sub>* from *Methanococcus vannielii* SB

gtctatcacacaaaagggtttttgtaatgcaaaaaattgaatatgccaagaataatggcgtataaaaaatataaaactgatgttctaa  
atctttaaccctatttttctaataatttttaaaactttttaacgtttaatctaaaaatggggggttttatgccatttaacgaataaacg  
cctatcaataactattaatataaaacgaggtgaaaaataatggcagacgaaaaagaaggctgaacaaaagaaaaagaaag  
ttacaaaaacaggctaatacaggaacgacaatcaaacagagaaagagtgagaattaaagaaaaagaatgggcccacaaaaag  
taggagttattatctattttaccatatttctatttttaaatatttataaaaaaaaggcatccttaaatgattggcattattttgagttt  
agtagattttcaagtaccataacttatttatctagtttttaaggtatttatcattataattaatgatagattaagaggaattcttagt  
agtgtctttgatccaaatttttagtcccattggtgta

*P<sub>hdrA2</sub>* from *Methanococcus vannielii* SB

gaaatccctcgacatagagaactgactcttaaaatagatattcgtacagtattatagattactaaataaaaaagttttattttaagtt  
tagaattttaaactaataacaaaagaataataaatttttaataatttttaaaataaaaaaagaataaacgtagagggtgaagaat  
aggggggtggtttatggtatgtaaagtatgattactctaaaaatagaacggggagggttagttctaattttataatttatgttttg  
taaattgttaaaactattataactgttaaaggtaataaaacgtagttttcatatgaggggtgggaatgggattaggagatataaat  
tcctacacgggtgtatcagtagtgaagtgggggtatgaggggggtttaaaataataatctcactactgtcccacacggtgcaaagtatac  
cttcaaacttaataatattaaactttatggttgcttaataatgacttttttaaaatattattcaataacgattatacttatttaattat  
attattacaagacattacatcgcttaataatattgtaattgccatataatacaaatctttatgggggtttagaattatagaaaat  
tttttattattgaattaattagtttagcccatattataatctaatattaatgggcagtattaggaattcaagaatgtatcttttata  
atgaggtgagtgtagtataaatgtataccaattacctactgttatatgtggaggtgaatcc

*P<sub>hdrC2</sub>* from *Methanococcus vannielii* SB

aagagcatagtttatatcgtttataccatctccattttaccacgattagtaattttggattagactgattaattcccttttaaaatggt  
tacaacatattctttgtatcatatgataagtagtgtttttggggcgaaggtgttactggatttagttcaacatctgttttaaaatctt  
tttaaaattttaaaatggctttatttgccttctcaatgggtgttcttaattttacttcaagtctttacgccatttataattttccaa  
tttctgttttttagcattagtagaacctctatatcgattaaactcttttcagttttttgattttcttcaatcaaaataccaccttct  
attactattttgaacaaggttaaaataaattattatatacaacagtataatagggcagcaactaataaataatattatattcc  
gcacaaaagatcctcgaggtgttactg

*P<sub>hdrC1</sub>* from *Methanococcus vannielii* SB

gcaccgatttcaacaaccttgcagcactccaaggtgaatgtgtgaacaaattccgcatatttttcgcacaatatacatgcttttca  
acgggaagtcctccattaacctctacaccctatggtttacaccaattgaagttcagcatctttactatttcatcttcaataaaagt  
cttaaacgatcggttcaagcattgttgcgtgaacaggcccaattgcgatttctcttctgacatgattctcacttttaagtaatttataat  
aatctaactcagtgaaattatacgttaagtataagaaaactaatattatcgttattaattaatcatcatttgattatgataattatag  
attagtaatccctttatattattaattattatccaatccctattatatacctatataataggtgaataaattagcaaatatataccag  
tttcaagaaaaattaaactataaggaggtgaagcga

*P<sub>fdh</sub>* from *Methanococcus vannielii* SB

ctgtgaagaaagaacgttatagatgggtgtaggacttctaaggaacatcctgcaatcccaaagatgtcgaattgatgggtatctta  
tgaatattgaatcgggaaagtttaataatagcctaaataactgtggatgatgcccaaagggcgggacacctccgatctaacccat  
agagtcaagccaactcaagtagcctaaatagttcagataaactagcctaaactttatctgctcactaaataactcaaaatacattat  
cattttcatattttatattcttttattttttatattaagtagtataaagtaataatagcacgatattttttatattaagtagtactgat  
aaagtaatatagcacgaaaaattgaaaatagcacacaataattatagcacaatggattagtagaactaatttggaaactaatcttt  
aactgaaaaccaaaggtgtcacacataatttaacggtgatgatta

*P<sub>mcr\_JJ</sub>* from *Methanococcus maripaludis* JJ

attacatcttatttagctttataaaaatagtaataataatctattaaaaacatccgttttctcaacaatagcagggttaatttcg  
attaacacagtagtactgactaaaaatcgagatatttaacctaacttaaatcgatgatggagagtatatatattttctatttga  
gtttaatgaaaactgaaatataattctttcagtaattgtatgatgtatatatacaaaaaataggagtggttct

*P<sub>mcrR\_JJ</sub>* from *Methanococcus maripaludis* JJ

aggaaccactcctattttttgatatacatcataacactgaaagaatataattcaagtttccattaaactcaaatagaaaaat  
atatactctcatcatcgattaagtttagattaggttaaatctcgtatttttagtacgtaataactgtgtaaatcgaatcaaccctgcta  
ttgttgagataaaacggatgttttaataagattatttgattactattttataaagctaaataagatggtaat

*P<sub>fia\_JJ</sub>* from *Methanococcus maripaludis* JJ

tttatagattcccgatgttcaaatgcatattttccaacagaaagaacatctcgaatctgaaaaatcaaaaccagatattccttttgat  
ctgcaccgcttttgatttaaatgataatcagttgatttaaaagatcctatcattattatcacgcttttaataagtaataattattatgaattaa

atggattatattcgTTTTGcatgtgttTgtgtaggtaaccgTTTTcattaaattaccTAcataatcatatacataactacatacaaaa  
ccaaatacagcaccatattgccccaaataagtGcaaaaaagTatatattaacaaaaaacgacatatttcttcgggaatatccccgaaga  
ggtaaaaatctcaaggattcatacagattctaaaggctagaactctgaaaagaagctggtgaacttaggagggtcaatc

BRE region is in red; TATA box is in blue; ribosome binding site is in green; transcription factor EarA binding sites are in orange; transcription start site is in gray box<sup>9</sup>.

*P<sub>glnA</sub>* from *Methanococcus vannielii* SB

taaatcacctgaatttggaataattcataattatctgaaaagtatatcaaactatccaaatattaaaaattaccgccatttaaaat  
attgaatgtaccgtaaactatataattgaaaaagcggaaagctatttctataaaagatgatttggagggaatatat

Two putative TATA boxes are in blue. The two putative TATA box are overlapped. The first TATA box is underlined, and the second TATA box is in yellow box; operator is in purple; ribosome binding site is in green; putative transcription start sites are in gray box<sup>10</sup>.

*P<sub>nif</sub>* from *Methanococcus vannielii* SB

ctttttaccacctgaaagaaaaacttatacttaatatattttcttagtaatttaaagaagtttcgtattgaattaaataaaaagttaaatac  
cacagtttaactttatgtaattttttatgattaatgtttttattagctaatccgaaagatttatataattggaatatagtatatgatatt  
tcaccggaagtacttccgtaataataataataaaggaaataaattcctaaaatgatgatgcaatagaggcttagt

TATA box is in blue; transcription start site is in gray box; operators are in purple<sup>1</sup>.



## Reference

- (1) Dodsworth, J. A.; Leigh, J. A. Regulation of nitrogenase by 2-oxoglutarate-reversible, direct binding of a PII-like nitrogen sensor protein to dinitrogenase. *Proc. Natl. Acad. Sci. U. S. A.* **2006**, *103* (26), 9779–9784. <https://doi.org/10.1073/pnas.0602278103>.
- (2) Walters, A. D.; Smith, S. E.; Chong, J. P. J. Shuttle vector system for *Methanococcus maripaludis* with improved transformation efficiency. *Appl. Environ. Microbiol.* **2011**, *77* (7), 2549–2551. <https://doi.org/10.1128/AEM.02919-10>.
- (3) Lyu, Z.; Jain, R.; Smith, P.; Fetchko, T.; Yan, Y.; Whitman, W. B. Engineering the autotroph *Methanococcus maripaludis* for geraniol production. *ACS Synth. Biol.* **2016**, *5* (7), 577–581. <https://doi.org/10.1021/acssynbio.5b00267>.
- (4) Zetsche, B.; Gootenberg, J. S.; Abudayyeh, O. O.; Slaymaker, I. M.; Makarova, K. S.; Essletzbichler, P.; Volz, S. E.; Joung, J.; van der Oost, J.; Regev, A.; Koonin, E. V.; Zhang, F. Cpf1 Is a single RNA-guided endonuclease of a Class 2 CRISPR-Cas system. *Cell* **2015**, *163* (3), 759–771. <https://doi.org/10.1016/J.CELL.2015.09.038>.
- (5) Ran, F. A.; Hsu, P. D.; Wright, J.; Agarwala, V.; Scott, D. A.; Zhang, F. Genome engineering using the CRISPR-Cas9 system. *Nat. Protoc.* **2013**, *8* (11), 2281–2308. <https://doi.org/10.1038/nprot.2013.143>.
- (6) B. Whitman, W.; Shieh, J.; Sohn, S.; Caras, D. S.; Premachandran, U. Isolation and characterization of 22 mesophilic *Methanococci*. *Syst. Appl. Microbiol.* **1986**, *7* (2–3), 235–240.
- (7) Fonseca, D. R.; Halim, M. F. A.; Holten, M. P.; Costa, K. C. Type IV-like pili facilitate transformation in naturally competent archaea. *J. Bacteriol.* **2020**, *202* (21), 1–12. <https://doi.org/10.1128/JB.00355-20>.
- (8) Gibson, D. G.; Young, L.; Chuang, R. Y.; Venter, J. C.; Hutchison, C. A.; Smith, H. O. Enzymatic assembly of DNA molecules up to several hundred kilobases. *Nat. Methods* **2009**, *6* (5), 343–345. <https://doi.org/10.1038/nmeth.1318>.
- (9) Ding, Y.; Berezuk, A.; Khursigara, C. M.; Jarrell, K. F.; Maupin-furlow, J. A. Bypassing the Need for the Transcriptional Activator EarA through a Spontaneous Deletion in the BRE Portion of the Fla Operon Promoter in *Methanococcus Maripaludis*. *Frontiers in Microbiology.* **2017**, *8*, 1–10. <https://doi.org/10.3389/fmicb.2017.01329>.
- (10) Cohen-kupiec, R.; Marx, C. J.; Leigh, J. A. Function and Regulation of GlnA in the Methanogenic Archaeon *Methanococcus Maripaludis*. *J. Bacteriol.* **1999**, *181* (1), 256–261.
